# Supplementary material
Source: publisher site journal article supplement (https://www.dovepress.com/get_supplementary_file.php?f=485967.docx)
Supplement: Supplementary file 1 [file get_supplementary_file.php]

**Supplementary table 1 Baseline MMC T2DM patient characteristics**

| Variables | Total (n = 864) | EOD (n = 219) | LOD (n = 645) | p |
| --- | --- | --- | --- | --- |
| **PA, Median (IQR)** | 605.8 (553.9, 651.2) | 616.6 (546.4, 670.5) | 603.8 (555.3, 646.6) | 0.124 |
| **PA, n (%)** |  |  |  | 0.333 |
| Low | 86 (10.0) | 27 (12.3) | 59 (9.1) |  |
| Moderate | 472 (54.6) | 120 (54.8) | 352 (54.6) |  |
| High | 306 (35.4) | 72 (32.9) | 234 (36.3) |  |
| **Sleep duration(min/day)** | 490.1 (450.0, 540.0) | 480.0 (450.0, 540.0) | 510.0 (450.0, 540.0) | 0.039 |
| **Vegetables and fruit (g/day)** |  |  |  | 0.849 |
| <500 | 512 (59.5) | 128 (59) | 384 (59.7) |  |
| >=500 | 348 (40.5) | 89 (41) | 259 (40.3) |  |
| **Fish(meal/week)** |  |  |  | 0.999 |
| <=1 | 199 (23.2) | 50 (23) | 149 (23.2) |  |
| >=2, <100g/meal or >=100g/meal only 1 time | 170 (19.8) | 43 (19.8) | 127 (19.8) |  |
| >=2, >=100g/meal at least 2 times | 490 (57.0) | 124 (57.1) | 366 (57) |  |
| **soybean-derived products (g/day)** |  |  |  | 0.022 |
| <100 | 576 (67.1) | 137 (63.1) | 439 (68.4) |  |
| >=100, <250 | 250 (29.1) | 69 (31.8) | 181 (28.2) |  |
| >=250, <400 | 27 ( 3.1) | 6 (2.8) | 21 (3.3) |  |
| >=400, <500 | 5 ( 0.6) | 4 (1.8) | 1 (0.2) |  |
| >=500 | 1 ( 0.1) | 1 (0.5) | 0 (0) |  |
| **Salt(g/day)** |  |  |  | < 0.001 |
| <4 | 53 ( 6.1) | 15 (6.8) | 38 (5.9) |  |
| >=4, <=6 | 332 (38.5) | 71 (32.4) | 261 (40.5) |  |
| >6, <=8 | 287 (33.3) | 72 (32.9) | 215 (33.4) |  |
| >8 | 158 (18.3) | 34 (15.5) | 124 (19.3) |  |
| unclear | 33 ( 3.8) | 27 (12.3) | 6 (0.9) |  |
| **T2DM therapeutic regimen** |  |  |  | 0.008 |
| Lifestyle modification only | 234 (27.1) | 43 (19.6) | 191 (29.6) |  |
| Lifestyle modification + OAD | 499 (57.8) | 131 (59.8) | 368 (57.1) |  |
| Lifestyle modification + insulin | 20 ( 2.3) | 7 (3.2) | 13 (2) |  |
| Lifestyle modification + OAD + insulin | 111 (12.8) | 38 (17.4) | 73 (11.3) |  |

Note: Data are medians (IQR). Continuous (categorical) variables were compared at baseline between EOD and LOD patients with Mann-Whitney U tests (chi-square tests).

Abbreviations: MMC, Metabolic Management Center; T2DM, type 2 diabetes mellitus; EOD, early-onset T2DM; LOD, late-onset T2DM; PA, physical activity; OAD, oral antidiabetic drugs.

.

**Supplementary table 2 Association of age at diabetes onset with percentage changes of HbA1c**

|  | Unadjusted | | Model 1 | | Model 2 | | Model 3 | |
| --- | --- | --- | --- | --- | --- | --- | --- | --- |
|  | OR (95% CI) | p value | OR (95% CI) | p value | OR (95% CI) | p value | OR (95% CI) | p value |
| LOD | Reference |  | Reference |  | Reference |  | Reference |  |
| EOD | 7.82 (4.67~10.98) | <0.001 | 2.61 (0.54~4.68) | 0.014 | 2.57 (0.49~4.65) | 0.016 | 2.65 (0.47~4.82) | 0.017 |

Note: the analysis was performed using multivariable logistic regression. Model 1: adjusted for sex, follow-up frequency, BMI, SBP, HbA1c, TC, and diabetes duration; Model 2: adjusted as for model 2, additionally adjusted for diabetes medication; Model 3: adjusted as for model 3, additionally adjusted for physical activity, diet, and sleep duration.

Abbreviations: OR: odds ratio; CI: confidence interval; HbA1c: glycated hemoglobin; EOD, early-onset T2DM; LOD, late-onset T2DM.
